# Supplementary material
Source: HighWire-hosted journal article supplement (https://n.neurology.org/content/suppl/2012/04/17/01.wnl.0000258549.13334.16)
Supplement: nagel.pdf [file nagel.pdf]

M. A. Nagel  
B. Forghani  
R. Mahalingam  
M. C. Wellish  
R. J. Cohrs  
A. N. Russman  
I. Katzan  
R. Lin  
C. J. Gardner  
D. H. Gilden

## 2. UTILIDAD DE LA DETECCIÓN DEL ANTICUERPO IGG ANTI-VVZ EN EL LCR EN EL DIAGNÓSTICO DE LA VASCULOPATÍA POR VVZ

**Antecedentes:** Los factores que pueden dificultar el diagnóstico de la vasculopatía causada por el virus varicela-zóster (VVZ) son la ausencia de exantema antes de los accidentes isquémicos transitorios (AIT) o del ictus y la similitud en el cuadro clínico y en las alteraciones de las pruebas de imagen, los estudios angiográficos y el líquido cefalorraquídeo (LCR) en otras vasculopatías. El diagnóstico se basa en la confirmación virológica, mediante la detección del ADN del VVZ, el anticuerpo IgG anti-VVZ, o ambos, en el LCR. **Métodos:** Se estudiaron 14 pacientes de los propios autores con un diagnóstico de vasculopatía por VVZ basado en una combinación de alteraciones en los datos clínicos y los estudios de imagen, angiográficos y del LCR. Se analizó en todos los LCR el ADN del VVZ mediante reacción en cadena de la polimerasa (PCR) y el anticuerpo IgG anti-VVZ mediante inmunoensayo enzimático; los resultados fueron positivos en todos los pacientes en una de las pruebas o en ambas a la vez. De los 14 individuos, ocho tenían antecedentes de zóster reciente, mientras que seis no tenían antecedentes de exantema del zóster antes de padecer la vasculopatía. **Resultados:** Se detectó el anticuerpo IgG anti-VVZ en el LCR de los 14 individuos (100%), mientras que sólo en cuatro individuos se detectó el ADN del VVZ. La presencia del anticuerpo IgG anti-VVZ en el LCR resultó un indicador más sensible de la vasculopatía por VVZ que la detección del ADN del VVZ ( $p < 0,001$ ). **Conclusiones:** En la vasculopatía causada por el virus varicela-zóster (VVZ), la utilidad diagnóstica de la detección del anticuerpo IgG anti-VVZ en el LCR es superior a la del ADN del VVZ. Aunque la positividad en la PCR del ADN del VVZ en el LCR es de interés, una PCR negativa no excluye el diagnóstico de vasculopatía por VVZ. Sólo se puede descartar el diagnóstico de vasculopatía por VVZ cuando en el estudio del LCR se obtienen resultados negativos tanto para el ADN del VVZ como para el anticuerpo IgG anti-VVZ.

NEUROLOGY 2007;68:1069-1073
